# Supplementary material
Source: PubMed Central journal article supplement (PMC8386200)
Supplement: NIHMS1713308-supplement-Supplemental_Material_1.pdf [file NIHMS1713308-supplement-Supplemental_Material_1.pdf]

**Supplementary Table 1***Mean Scores and Standard Deviations on the Pediatric Quality of Life Family Impact Module*

| Family Impact Module Scale | <i>M</i> (SD)             |
|----------------------------|---------------------------|
| Total                      | 74.21 (17.7) <sup>a</sup> |
| Caregiver Quality of Life  | 72.61 (19.5) <sup>a</sup> |
| Physical Functioning       | 69.07 (22.5)              |
| Emotional Functioning      | 68.30 (22.5)              |
| Social Functioning         | 78.66 (20.2)              |
| Cognitive Functioning      | 75.80 (22.1)              |
| Family Functioning         | 77.89 (20.9) <sup>c</sup> |
| Daily Activities           | 72.46 (24.0) <sup>c</sup> |
| Family Relationships       | 80.98 (23.8) <sup>c</sup> |
| Communication              | 82.43 (20.2)              |
| Worry                      | 70.63 (24.9) <sup>b</sup> |

*Note:* <sup>a</sup>Significantly lower (i.e., greater impact) than the brain injury sample reported by de Kloet et al. (2015) at  $p \leq .05$ ; <sup>b</sup>Significantly lower (i.e., greater impact) than the community sample reported by Medrano et al, 2013 at  $p \leq .05$ ; <sup>c</sup>Significantly higher (i.e., lower impact) than the community sample reported by Medrano et al, 2013 at  $p \leq .05$ .
