# Supplementary material
Source: PubMed Central journal article supplement (PMC8386200)

PARENT-FOCUSED THERAPY FOR POST-INTENSIVE CARE SYNDROME

Supplemental Figure 1. Overview of the Pediatric Critical Care & Neurotrauma Recovery Program Model

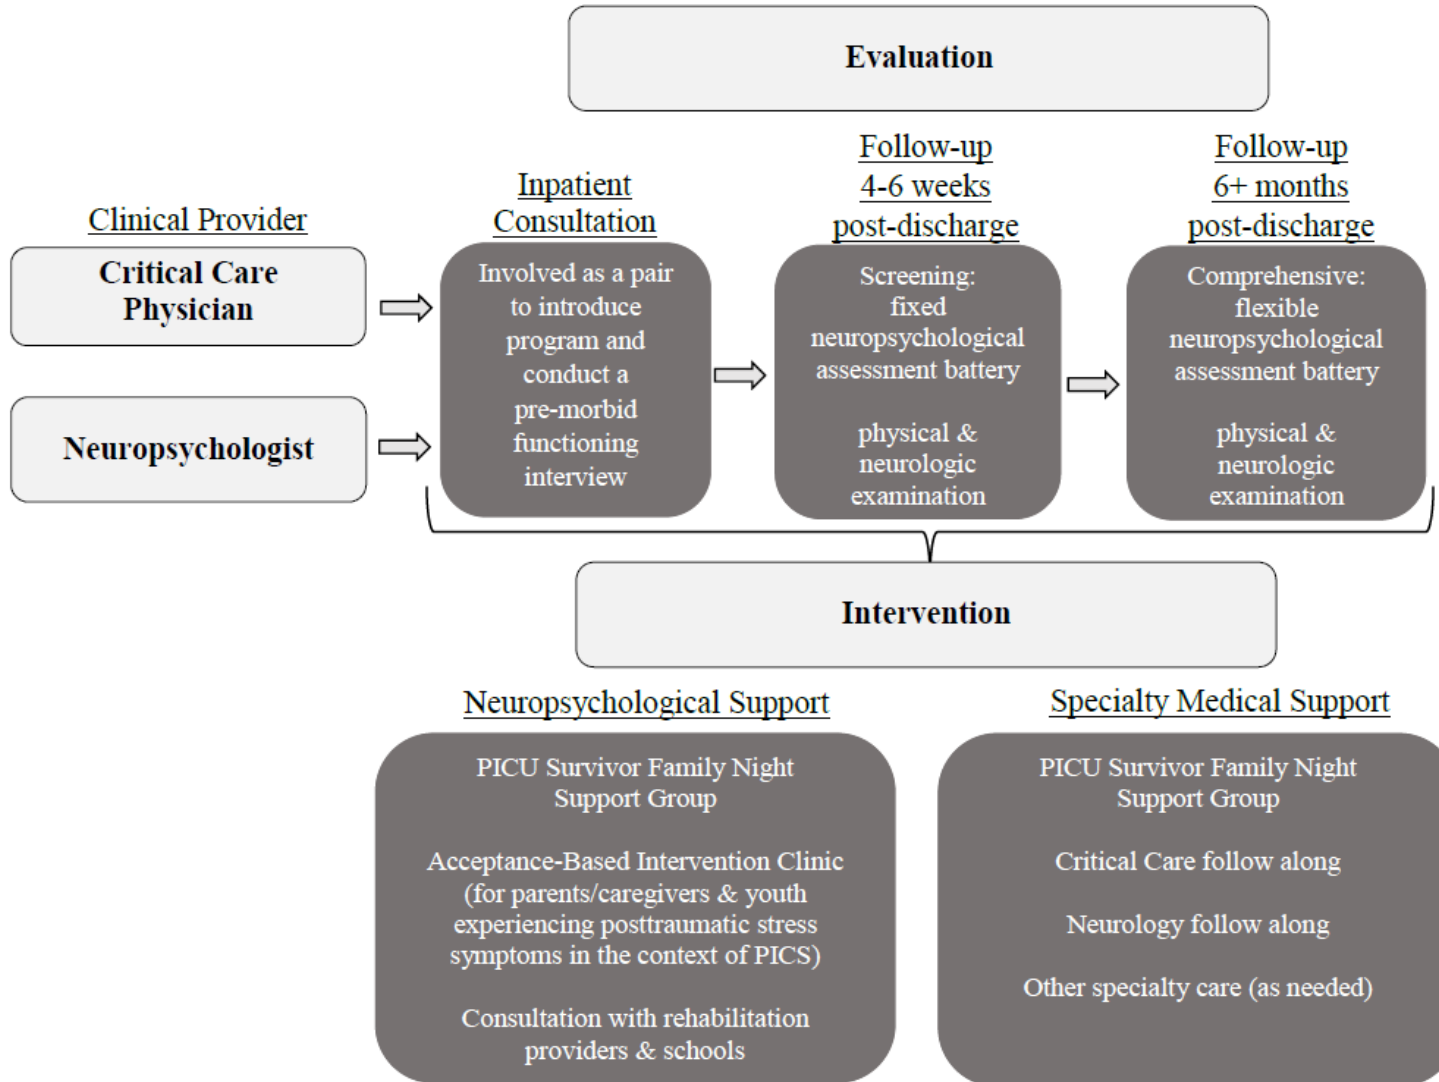

Supplement: NIHMS1713308-supplement-Supplemental_Material_2.pdf [file NIHMS1713308-supplement-Supplemental_Material_2.pdf]
